# Supplementary material
Source: publisher site journal article supplement (https://www.dovepress.com/article/377064)

Table S1. Antimicrobial resistance and Hypermucoviscous phenotype of DTR Vs Non-DTR Kp.

|  | DTR(n=50) | Non-DTR(n=50) | P value |
| --- | --- | --- | --- |
| **MDR** | **50(100.0%)** | **14(28.0%)** | **0.000** |
| **CR** | **50(100.0%)** | **2(4.0%)** | **0.000** |
| **ESCR** | **50(100.0%)** | **13(26.0%)** | **0.000** |
| **FQR** | **50(100.0%)** | **11(22.0%)** | **0.000** |
| **Piperacillin/tazobactam** | **50(100.0%)** | **4(8.0%)** | **0.000** |
| **Cefoperazone/sulbactam** | **50(100.0%)** | **3(6.0%)** | **0.000** |
| **Ceftazidime** | **50(100.0%)** | **10(20.0%)** | **0.000** |
| **Cefepime** | **50(100.0%)** | **11(22.0%)** | **0.000** |
| **Imipenem** | **50(100.0%)** | **1(2.0%)** | **0.000** |
| **Meropenem** | **50(100.0%)** | **2(4.0%)** | **0.000** |
| **Levofloxacin** | **50(100.0%)** | **11(22.0%)** | **0.000** |
| **Amikacin** | **35(70.0%)** | **2(4.0%)** | **0.000** |
| **Minocycline** | **24(48.0%)** | **13(26.0%)** | **0.023** |
| **Trimethoprim/sulfamethoxazole** | **21(42.0%)** | **10(20.0%)** | **0.017** |
| HvKp | 28(56.0%) | 27(54.0%) | 0.841 |
| Hypermucoviscosity | 26(52.0%) | 32(64.0%) | 0.224 |

Bold text: P value<0.05.

Figure S1. (A) Sequence type and (B) Capsule serotype distribution distribution of DTR-Kp strains.


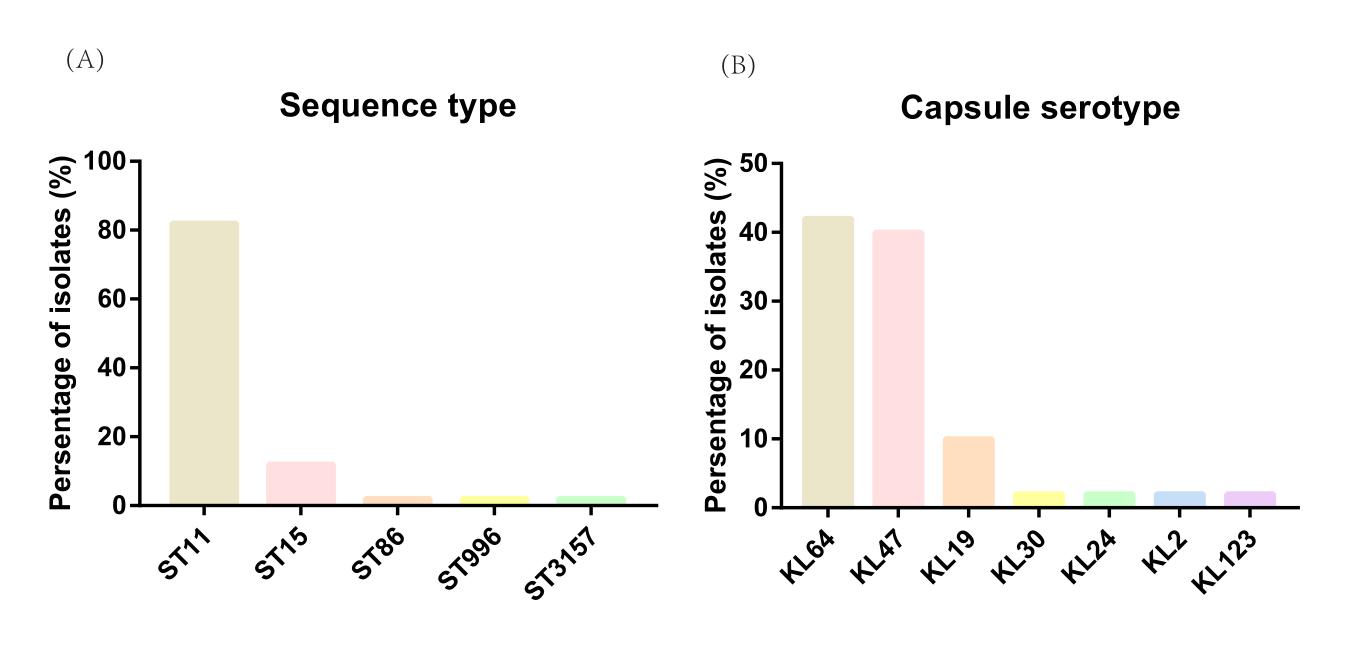


Table S2. Genomic characteristics of DTR Vs Non-DTR Kp.

|  | DTR(n=50) | Non-DTR(n=50) | P value |
| --- | --- | --- | --- |
| Resistance genes |  |  |  |
| ***aadA2*** | **28(56.0%)** | **5(10.0%)** | **0.000** |
| *aac(6')-Ib-cr* | 12(24.0%) | 7(14.0%) | 0.202 |
| *aadA16* | 2(4.0%) | 3(6.0%) | 1.000 |
| ***fosA3*** | **36(72.0%)** | **0(0.0%)** | **0.000** |
| *qnrS1* | 11(22.0%) | 6(12.0%) | 0.183 |
| ***mphA*** | **22(44.0%)** | **6(12.0%)** | **0.000** |
| *floR* | 3(6.0%) | 4(8.0%) | 1.000 |
| *arr-3* | 8(16.0%) | 4(8.0%) | 0.218 |
| *sul1* | 9(18.0%) | 9(18.0%) | 1.000 |
| ***tet(A)*** | **22(44.0%)** | **9(18.0%)** | **0.005** |
| ***dfrA1*** | **15(30.0%)** | **2(4.0%)** | **0.001** |
| ***blaKPC-2*** | **45(90.0%)** | **2(4.0%)** | **0.000** |
| ***blaTEM-1D*** | **40(80.0%)** | **6(12.0%)** | **0.000** |
| *blaOXA-1* | 10(20.0%) | 4(8.0%) | 0.084 |
| ***CTX-M-65*** | **22(44.0%)** | **0(0.0%)** | **0.000** |
| ***blaSHV-12*** | **7(14.0%)** | **0(0.0%)** | **0.012** |
| *blaSHV-11* | 27(54.0%) | 19(38.0%) | 0.108 |
| Virulence genes |  |  |  |
| Yersiniabactin |  |  |  |
| ***ybtS*** | **48(96.0%)** | **30(60.0%)** | **0.000** |
| ***ybtQ*** | **48(96.0%)** | **30(60.0%)** | **0.000** |
| ***ybtA*** | **48(96.0%)** | **30(60.0%)** | **0.000** |
| ***irp2*** | **48(96.0%)** | **30(60.0%)** | **0.000** |
| ***irp1*** | **48(96.0%)** | **30(60.0%)** | **0.000** |
| ***ybtT*** | **48(96.0%)** | **30(60.0%)** | **0.000** |
| ***ybtE*** | **48(96.0%)** | **30(60.0%)** | **0.000** |
| Colibactin |  |  |  |
| ***clbL*** | **1(2.0%)** | **13(26.0%)** | **0.001** |
| Aerobactin |  |  |  |
| *iucA* | 28(56.0%) | 23(46.0%) | 0.317 |
| *iucB* | 28(56.0%) | 23(46.0%) | 0.317 |
| *iucC* | 28(56.0%) | 23(46.0%) | 0.317 |
| *iucD* | 28(56.0%) | 23(46.0%) | 0.317 |
| *iutA* | 28(56.0%) | 23(46.0%) | 0.317 |
| Salmochelin |  |  |  |
| ***iroB*** | **1(2.0%)** | **26(52.0%)** | **0.000** |
| ***iroC*** | **1(2.0%)** | **26(52.0%)** | **0.000** |
| ***iroD*** | **1(2.0%)** | **26(52.0%)** | **0.000** |
| ***iroN*** | **1(2.0%)** | **25(50.0%)** | **0.000** |
| Other virulence genes |  |  |  |
| ***rmpA*** | **12(24.0%)** | **25(50.0%)** | **0.007** |
| *rmpA2* | 19(38.0%) | 20(40.0%) | 0.838 |
| ***peg-344*** | **12(24.0%)** | **25(50.0%)** | **0.007** |
| *peg-589* | 28(56.0%) | 22(44.0%) | 0.230 |

Bold text: P value<0.05.

Figure S2. Kaplan–Meier curves for all-cause 30-day mortality in (A) hvKp, (B) cKp subgroup and (C) DTR group.


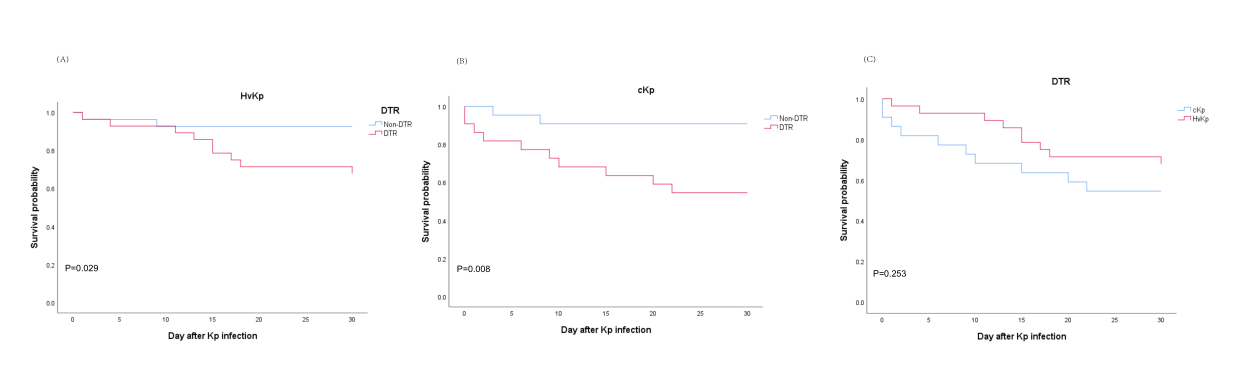


Figure S3. The phylogenetic tree of DTR Kp strains isolated in this study. A. DTR-ST11 Kp strains; B. DTR-Non-ST11 Kp strains.


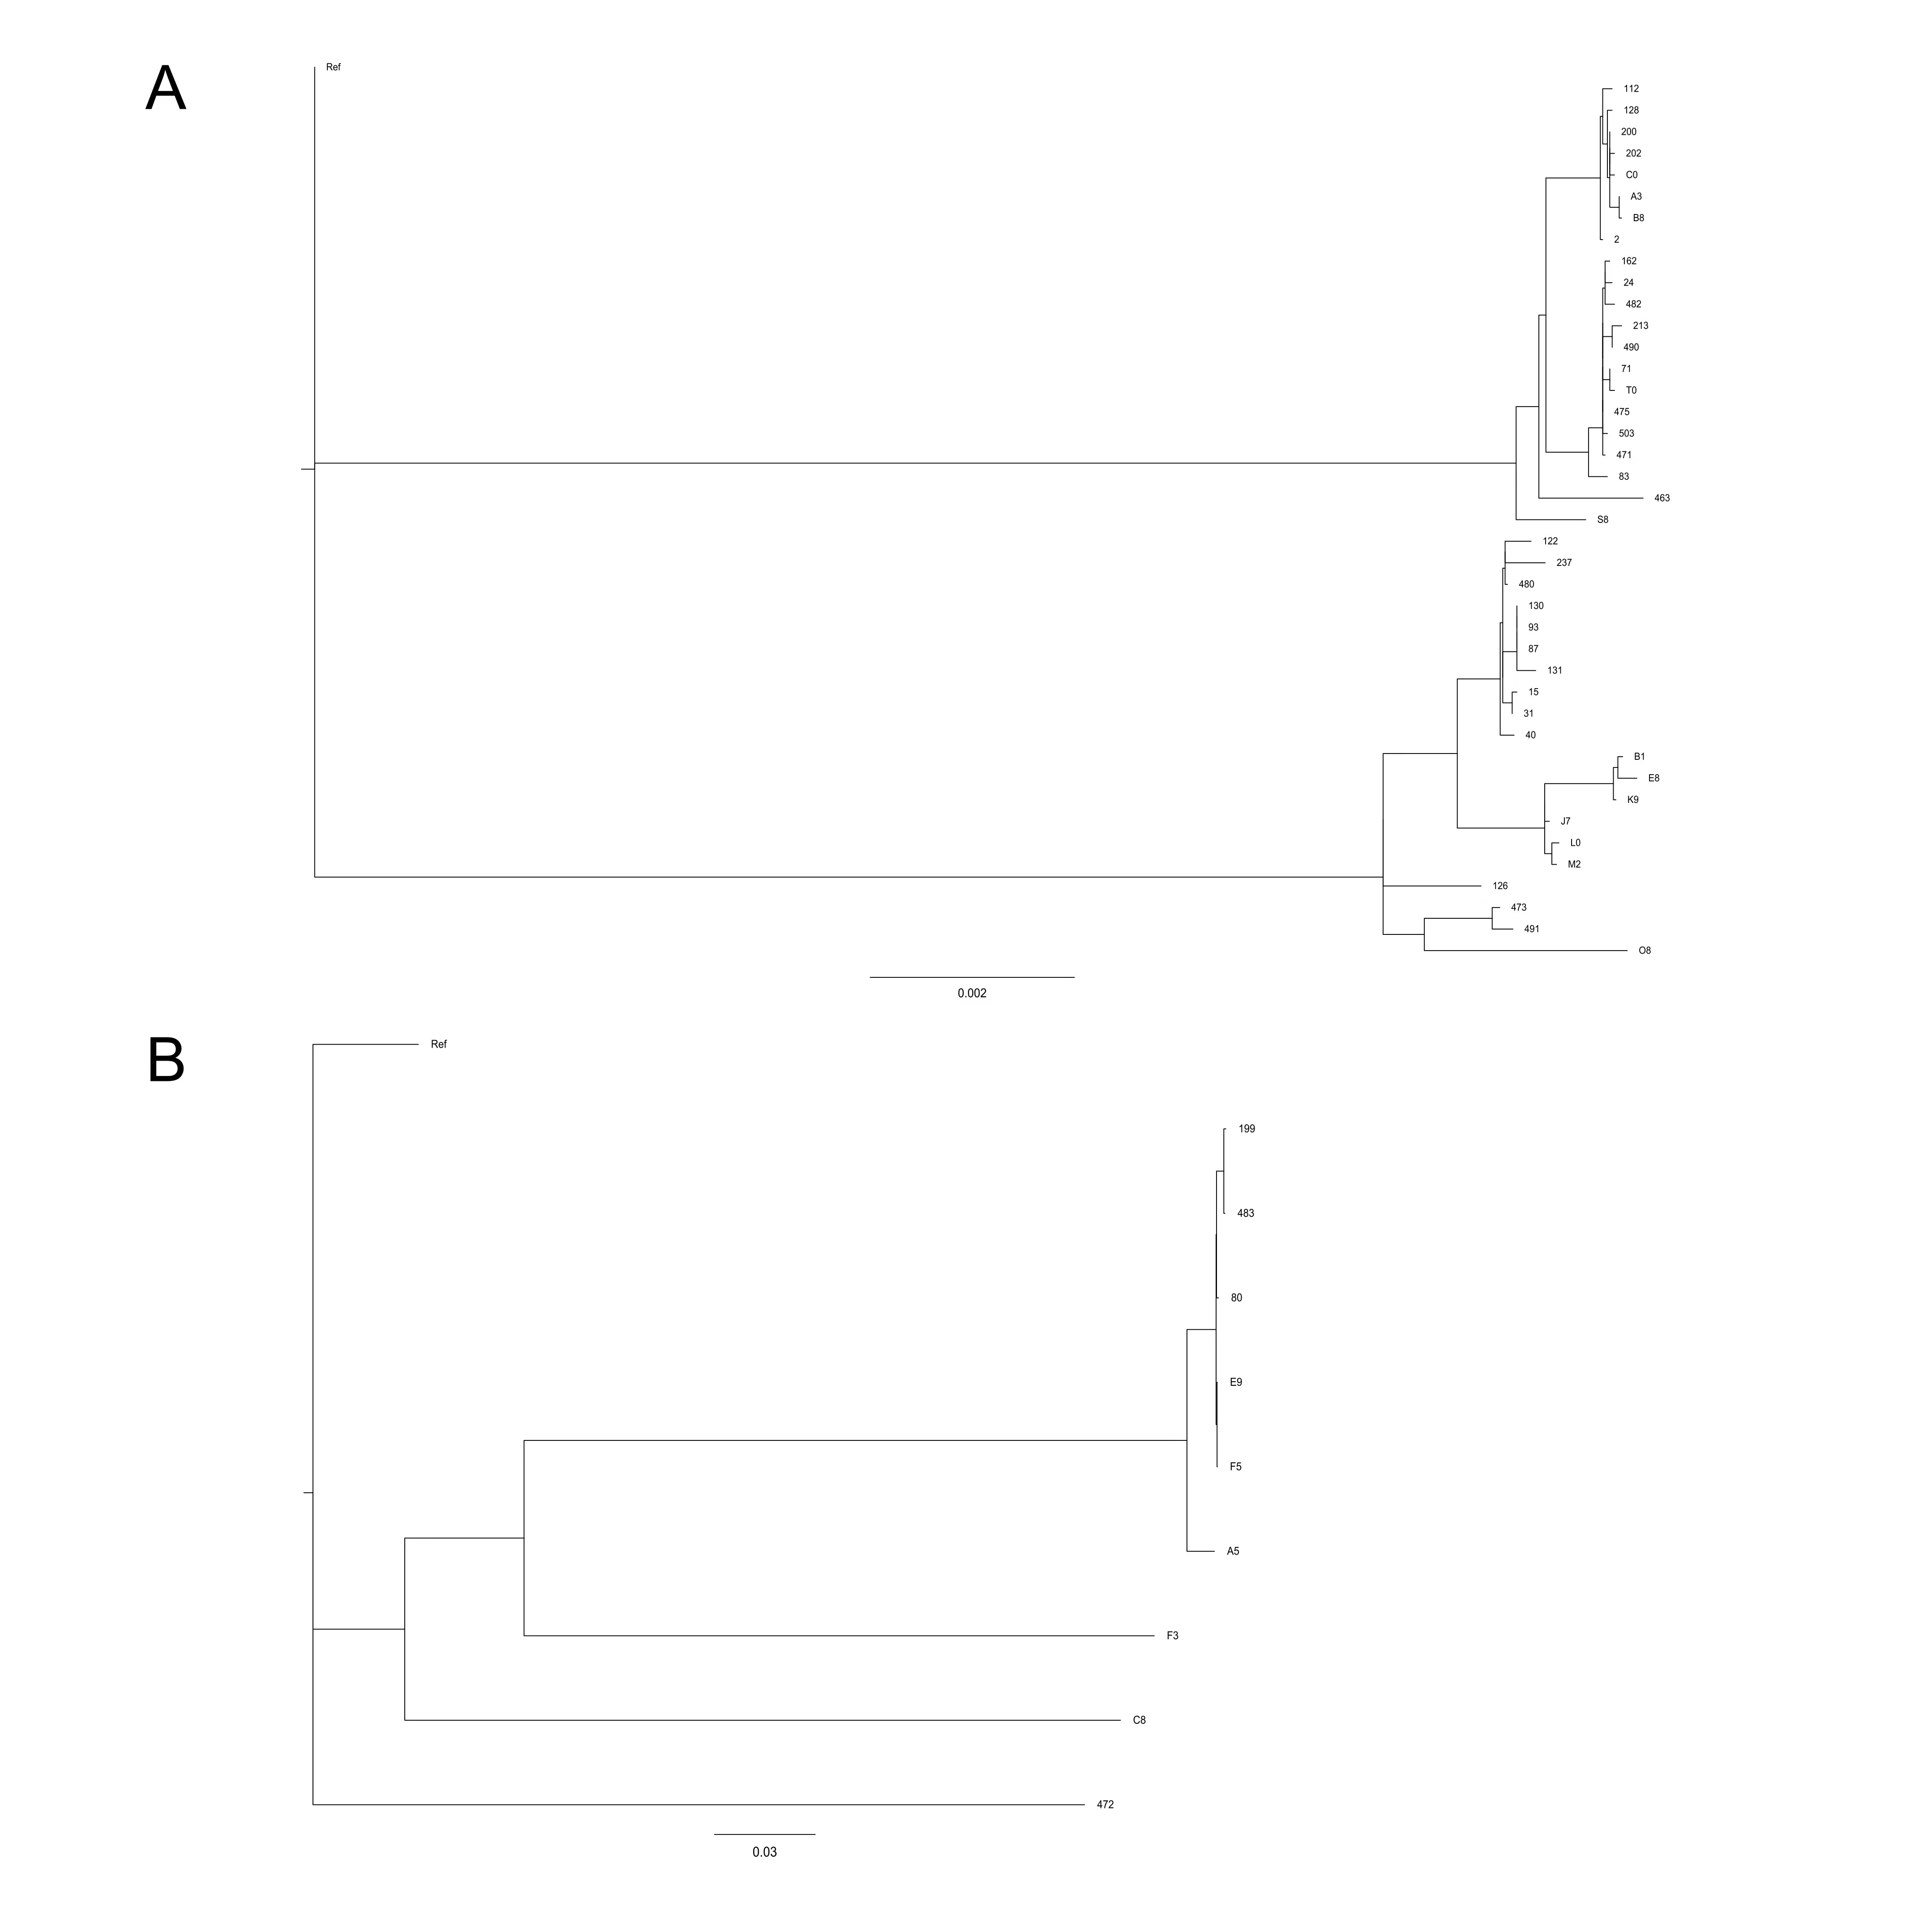

Supplement: Supplementary file 1 [file get_supplementary_file.php]
